# Supplementary material
Source: PubMed Central journal article supplement (PMC6873708)
Supplement: NIHMS1025750-supplement-2.pdf [file NIHMS1025750-supplement-2.pdf]

**A clinically relevant murine model unmasks a 'Two-Hit' mechanism for reactivation and dissemination of cytomegalovirus following kidney transplantation**

Zheng Zhang<sup>1,2</sup>, Longhui Qiu<sup>1</sup>, Shixian Yan<sup>1</sup>, Jiao-Jing Wang<sup>1</sup>, Paul M. Thomas<sup>7</sup>,  
Manoj Kandpal<sup>1,6</sup>, Lihui Zhao<sup>1,6</sup>, Andre Iovane<sup>1</sup>, Edward B. Thorp<sup>4</sup>, Qing Chen<sup>4</sup>,  
Mary Hummel<sup>1,2,5</sup>, Yashpal S. Kanwar<sup>3,4</sup>, Michael M. Abecassis<sup>1,2,5\*</sup>

<sup>1</sup>Comprehensive Transplant Center, Departments of <sup>2</sup>Surgery, <sup>3</sup>Nephrology,  
<sup>4</sup>Pathology, <sup>5</sup>Microbiology and Immunology, and <sup>6</sup>Preventive Medicine,  
Northwestern University, Feinberg School of Medicine, Chicago, IL 60611

<sup>7</sup>Department of Chemistry and Chemistry of Life Processes Institute, Northwestern  
University, Evanston, IL 60208

**SUPPLEMENTAL DATA**

Supplement Figure 1

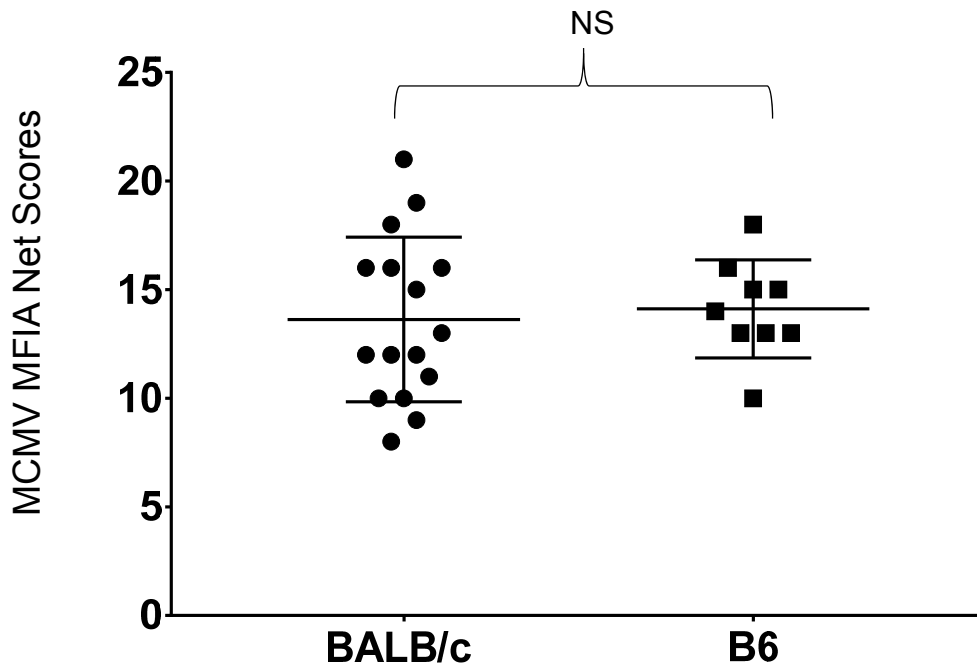

**Supplement Figure 1, Donor mcmv latency were confirmed by serological analysis (EZ spot) and no difference in MFIA score was noted between BALB/c and B6.** Plasma were collected at BALB/c or B6 mice at 6 months post infection. MCMV Multiplexed Fluorometric Immune Assay (MFIA) was performed by Charles River Research Animal Diagnostic Services (Wilmington MA ). Interpretation of MFIA/ELISA Net Scores: Provided that the Tissue Control score < 2.0, 1 is Negative, 2 is Equivocal and 3 or higher is Positive .

**Table 1. D+/R- kidney transplant mediate MCMV reaction and productive infection at POD28.**

| Recipient ID | DNA copies per million cells |    |                     |              | Plaques (pfu/SG)            |
|--------------|------------------------------|----|---------------------|--------------|-----------------------------|
|              | Donor Controls*              |    | Recipients at POD28 |              |                             |
|              | Kidney                       | SG | Transplanted kidney | Recipient SG |                             |
| RT259        | 30                           | 0  | 8614                | 482013       | <b>9 x 10<sup>3</sup></b>   |
| RT260        | 0                            | 45 | 70063               | 123727       | <b>7.6 x 10<sup>4</sup></b> |
| RT261        | 0                            | 0  | 40378               | 357178       | <b>6 x 10<sup>3</sup></b>   |
| RT262        | 61                           | 0  | 30806               | 328730       | <b>1 x 10<sup>3</sup></b>   |
| RT263        | 0                            | 0  | 15475               | 41419        | <b>2.2 x 10<sup>4</sup></b> |

\* Contralateral latent kidney and salivary gland.

Supplemental figure 2

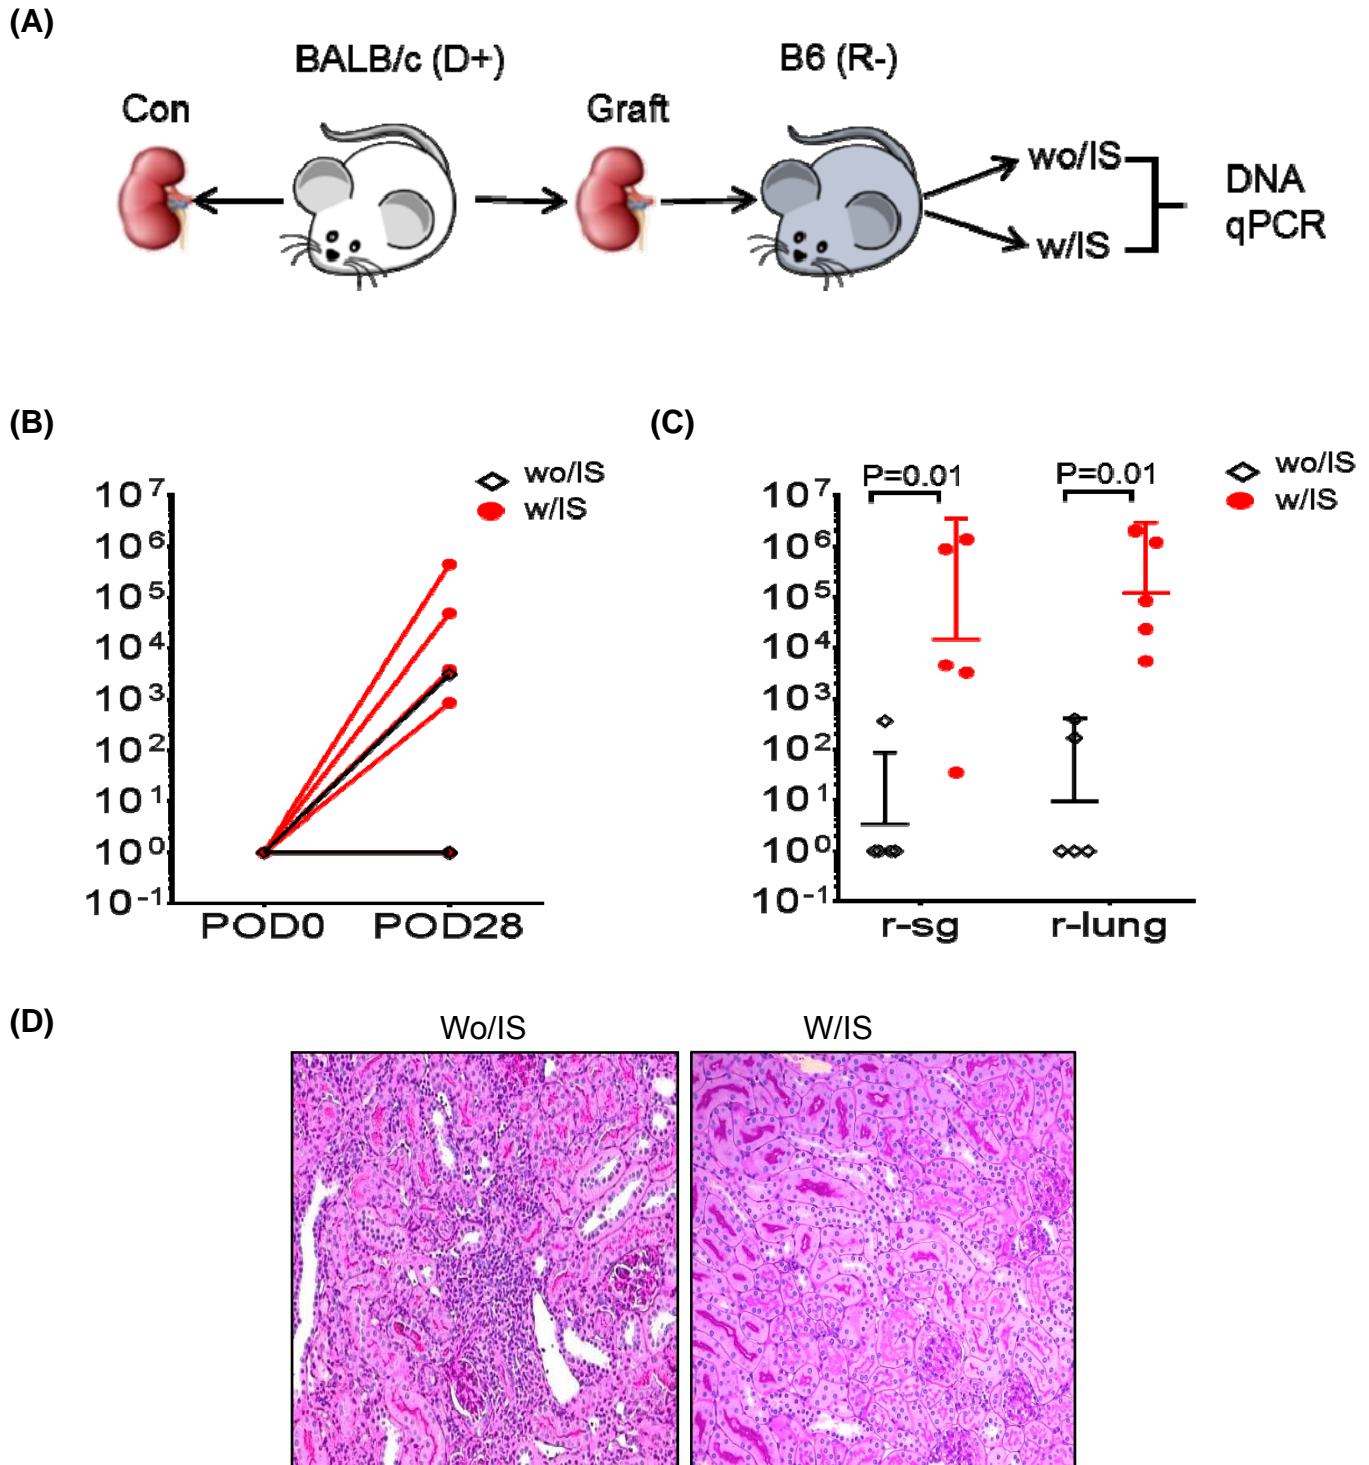

**Supplement Figure 2. MCMV reactivation and systemic dissemination were also detected in BALB/c (D+) to B6 (R-) allogeneic transplants treated w/IS.** Kidneys from latently infected BALB/c were transplanted into B6 mice respectively.

(A): Schematic of experimental setup..

(B): DNA abundance POD0 (contralateral donor kidney) and POD28 in kidney grafts.

(C): DNA abundance at day 28 post-transplant recipients' salivary gland (r-SG) and lungs (r-lung).

(D): Representative images showing histology of the kidney allograft without IS (wo/IS, left) or with IS (w/IS, right) at POD28.

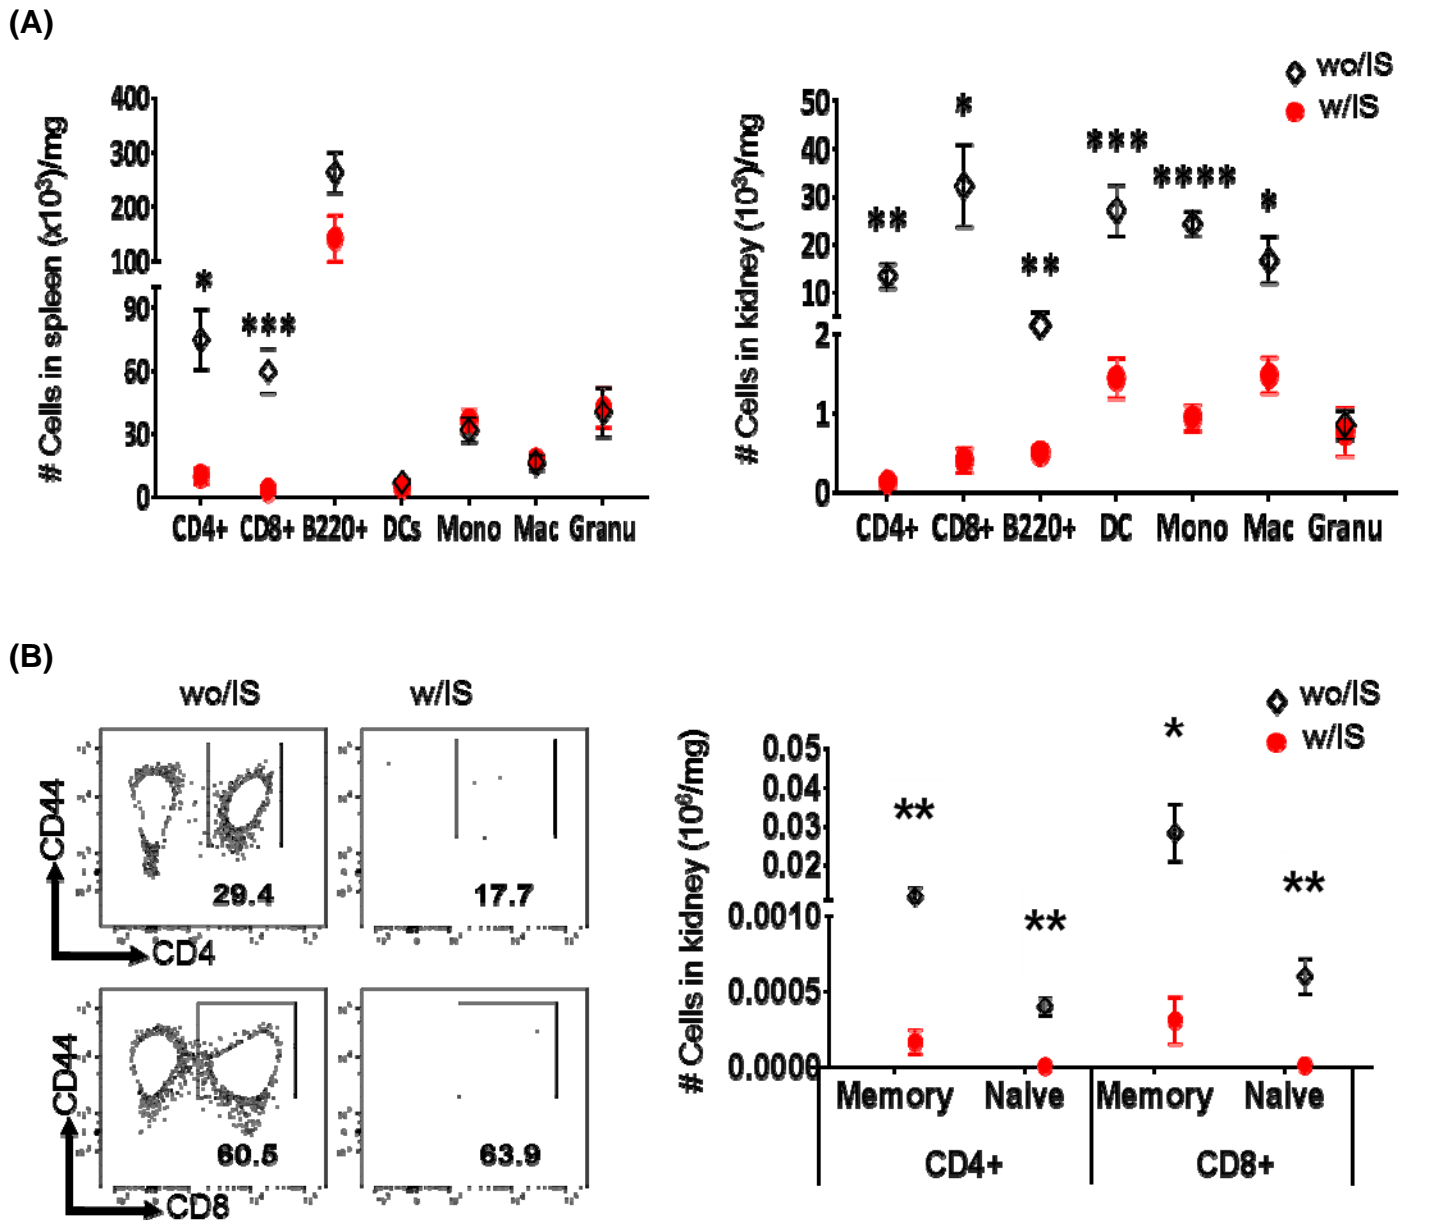

**Supplement Figure 3. Effect of IS on immune phenotypes in spleens and kidney allograft following D+/R- kidney transplant at day 7.** Cells isolated from spleens and renal grafts of D+/R- kidney allografts w/IS (n=4) or w/o IS (n=4) at POD 7 were analyzed by flow cytometry. Frequencies of recipients' T cells (gated on CD45.2<sup>+</sup>CD3<sup>+</sup> cells), and myeloid cells (gated on CD45.2<sup>+</sup>CD11b<sup>+</sup> cells), including DC (CD11c<sup>+</sup>MHCII<sup>+</sup> dendritic cells), Mac (CD11b<sup>+</sup>F4/80<sup>+</sup> macrophages), Mono (CD11b<sup>+</sup>Ly6C<sup>+</sup> monocytes), and Granu (Ly6G<sup>+</sup>granulocytes) were determined based on total number of live cells normalized by tissue weight (mg). Data in bar graphs are expressed as mean value with SEM. \*p ≤ 0.05; \*\*p < 0.01; \*\*\*p < 0.001; \*\*\*\*p < 0.0001.

(A): Absolute number of cells in spleens (left) and kidney grafts (right)

(B): Percentage (left) and absolute number (right) of infiltrating CD44<sup>+</sup>CD4<sup>+</sup> T cells and CD44<sup>+</sup>CD8<sup>+</sup> T cells in kidney grafts (/mg), gated on CD45<sup>+</sup>CD3<sup>+</sup> cells. Data are expressed as mean value with SEM.

## Supplemental figure 4

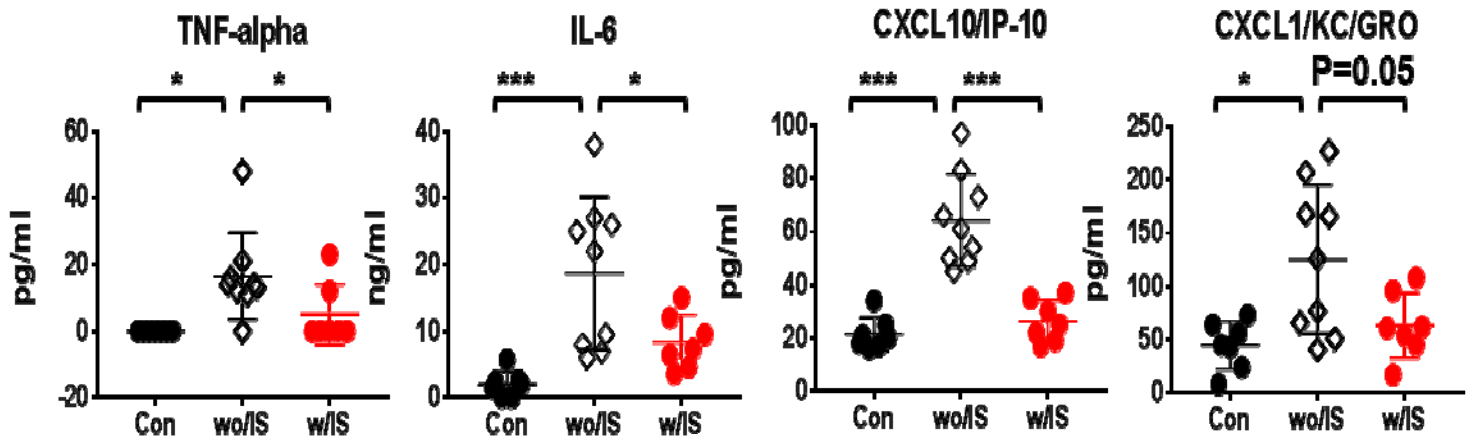

**Supplement Figure 4 Plasma proteomic analysis following transplantation.** Plasma samples were collected from D+ to R- kidney allografts treated w/IS or wo/IS at 48hr post-transplant (n=6-8/group). Plasma samples from naïve B6 mice were used as controls (con). \*P<0.05, \*\*P<0.01, \*\*\*P<0.001
